# Supplementary material
Source: publisher figshare collection journal article supplement (https://acs.figshare.com/ndownloader/files/3948532)
Supplement: Supplementary file 1 [file 3948532]

## Supporting Information for:

### Differential Resistance of Drinking Water Bacterial Populations to Monochloramine

#### Disinfection.

Tzu-Hsin Chiao,<sup>†,||,§</sup> Tara M. Clancy,<sup>†,§</sup> Ameet Pinto,<sup>†,⊥</sup> Chuanwu Xi,<sup>‡</sup> and Lutgarde Raskin<sup>\*,†</sup>

<sup>†</sup> Department of Civil and Environmental Engineering, University of Michigan, Ann Arbor, Michigan 48109, United States

<sup>‡</sup> Department of Environmental Health Sciences, University of Michigan, Ann Arbor, Michigan 48109, United States

#### Contents:

|                                                                                                                                                                                                                                                                                                                                                                                                                                                     |   |
|-----------------------------------------------------------------------------------------------------------------------------------------------------------------------------------------------------------------------------------------------------------------------------------------------------------------------------------------------------------------------------------------------------------------------------------------------------|---|
| <b>Table S1.</b> Primers used for amplification of 16S rRNA gene sequences.....                                                                                                                                                                                                                                                                                                                                                                     | 2 |
| <b>Table S2.</b> Pyrosequencing data summary .....                                                                                                                                                                                                                                                                                                                                                                                                  | 3 |
| <b>Figure S3.</b> Gel image comparing PCR results with different amplicon lengths (top: 180 bp, bottom: 1379 bp) during inactivation of <i>E. coli</i> with 20 mg/L of monochloramine. Ct values in mg·min/L are provided above each band in the gel images. Ladders are 100 bp and 1 kb, for top and bottom, respectively (Invitrogen, Life Technologies, Grand Island, NY and Takara <sup>TM</sup> Clontech Laboratories, Mountain View, CA)..... | 6 |
| <b>Figure S4.</b> Relative abundance of OTUs represented by their taxonomic group for duplicate samples collected from laboratory-scale BAC filter inactivation experiment at different Ct values showing all bacteria (no PMA) (a) and the live fraction (PMA) (b). .....                                                                                                                                                                          | 7 |
| <b>Figure S5.</b> Principle coordinate plot showing the community structure ( $\theta_{yc}$ ) (a) and community membership (Jaccard Index) (b) for duplicate samples collected from the laboratory-scale BAC filter inactivation experiment for all bacteria (no PMA) and the live fraction (PMA treated). Numbers represent the Ct values in mg·min/L for the live fraction (PMA treated) samples. ....                                            | 8 |
| <b>References</b> .....                                                                                                                                                                                                                                                                                                                                                                                                                             | 9 |

**Table S1.** Primers used for amplification of 16S rRNA gene sequences

| <b>Primer</b>                       | <b>Sequence (5' – 3')</b> | <b>Base Position<br/>(<i>E. coli</i><br/>numbering)</b> | <b>Reference</b>                                              |
|-------------------------------------|---------------------------|---------------------------------------------------------|---------------------------------------------------------------|
| <i>180 bp (qPCR)</i>                |                           |                                                         |                                                               |
| 338F                                | ACTCCTACGGGAGGCAGCAG      | 338-357                                                 | 1                                                             |
| 518R                                | ATTACCGCGGCTGCTGG         | 502-518                                                 | 1                                                             |
| <i>389 bp (pyrosequencing)</i>      |                           |                                                         |                                                               |
| 563F                                | AYTGGGYDTAAAGNG           | 563-577                                                 | <a href="http://pyro.cme.msu.edu">http://pyro.cme.msu.edu</a> |
| 909R                                | CCGTCAATTYHTTTRAGT        | 892-909                                                 | 2                                                             |
| <i>1379 bp<br/>(pyrosequencing)</i> |                           |                                                         |                                                               |
| 8F                                  | AGRGTTTGATCMTGGCTCAG      | 8-27                                                    | 2                                                             |
| 1387R                               | GGGCGGWGTGTACAAGRC        | 1369-1387                                               | 2                                                             |

**Table S2.** Pyrosequencing data summary

|                                       | Number of samples | Raw reads | Quality sequences | Sequences identified as chimeras | Sub-sampling (reads/sample)                        |
|---------------------------------------|-------------------|-----------|-------------------|----------------------------------|----------------------------------------------------|
| Laboratory-scale inactivation samples | 36                | 81980     | 60484             | 10142                            | 763<br>(2123 when duplicate samples were combined) |
| Full-scale samples                    | 6                 | 1287      | 1175              | 17                               | 106                                                |

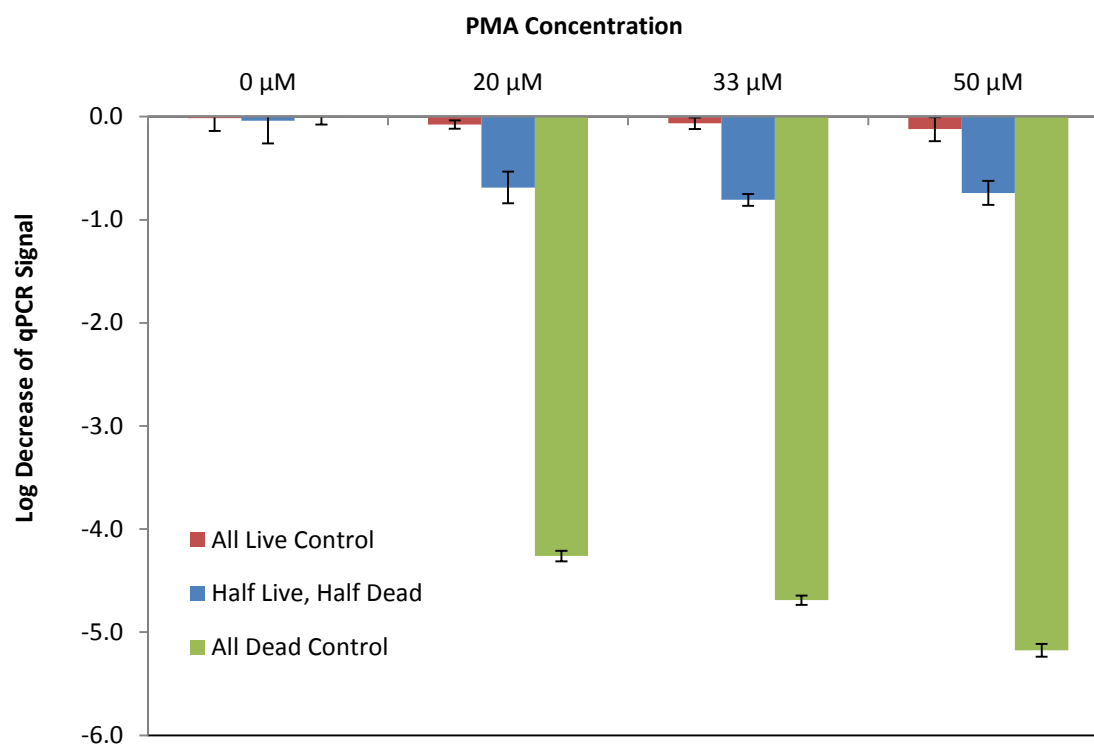

**Figure S1.** Results for qPCR with PMA treatment at various PMA concentrations for untreated (all live control), isopropanol treated (all dead control), and equal cell count live/dead mixture *E. coli* cells (half live, half dead). The 16S rRNA gene was quantified using the 338F and 518R primer pair. Average cell concentrations were approximately  $10^6$  to  $10^7$  cells/mL for all three types of samples. The results show that treatment with 50 μM PMA resulted in the greatest decrease in qPCR signal and thus the most complete removal of DNA from dead cells among the concentrations tested.

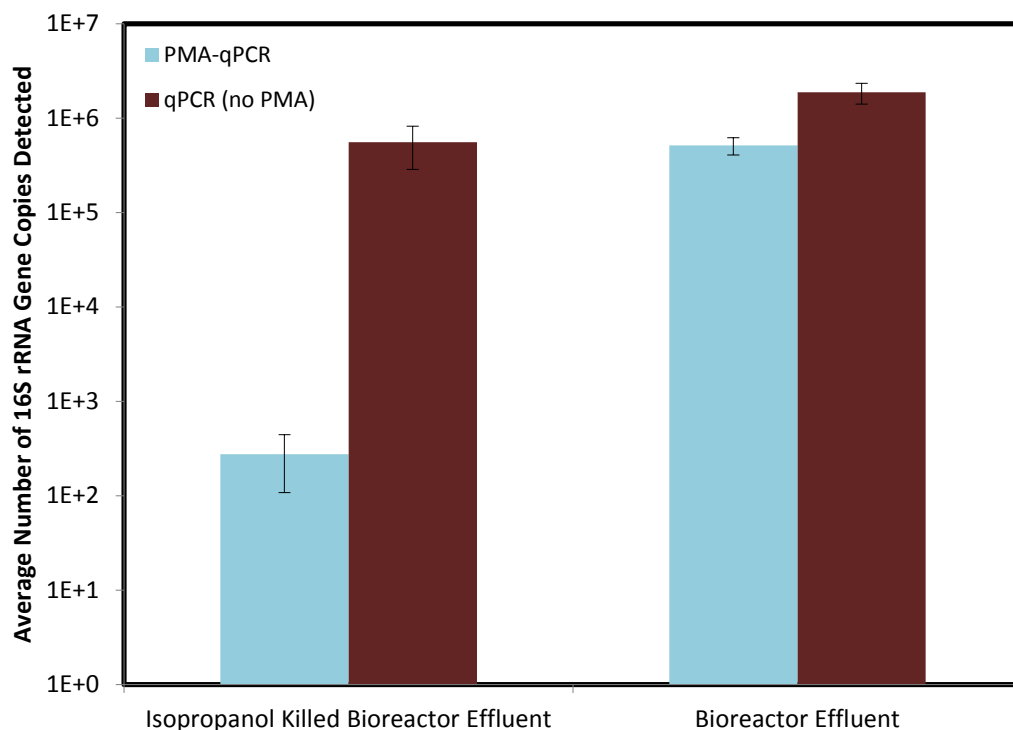

**Figure S2.** Results for qPCR with and without PMA treatment for isopropanol treated (killed) BAC filter effluent and untreated BAC filter effluent. The 16S rRNA gene was quantified using the 338F and 518R primer pair. The results show that PMA treatment helps to distinguish between live and dead cells. Without PMA treatment, there is little difference between the detection of live and dead cells. With PMA treatment, the number of cells measured in isopropanol treated controls were at least a 3-log units less than those in live controls.

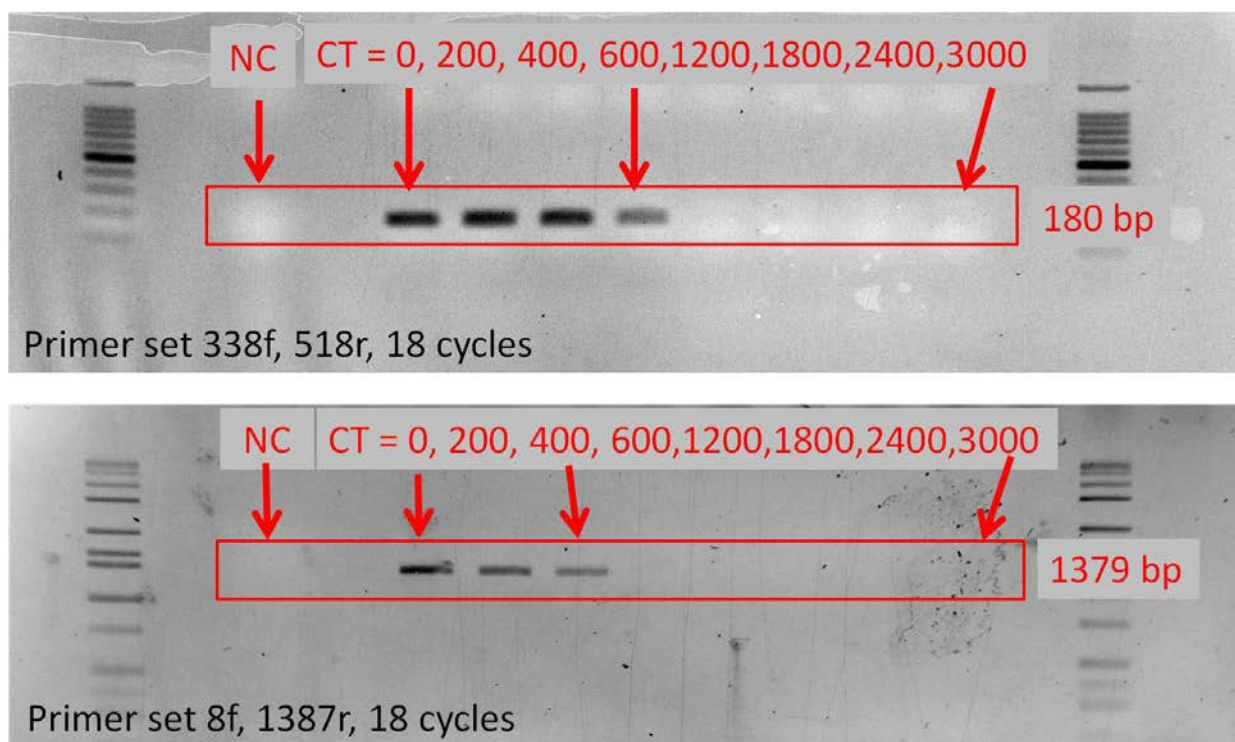

**Figure S3.** Gel image comparing PCR results with different amplicon lengths (top: 180 bp, bottom: 1379 bp) during inactivation of *E. coli* with 20 mg/L of monochloramine. Ct values in mg·min/L are provided above each band in the gel images and “NC” indicates negative control. Ladders are 100 bp and 1 kb, for top and bottom, respectively (Invitrogen, Life Technologies, Grand Island, NY and Takara<sup>TM</sup> Clontech Laboratories, Mountain View, CA).

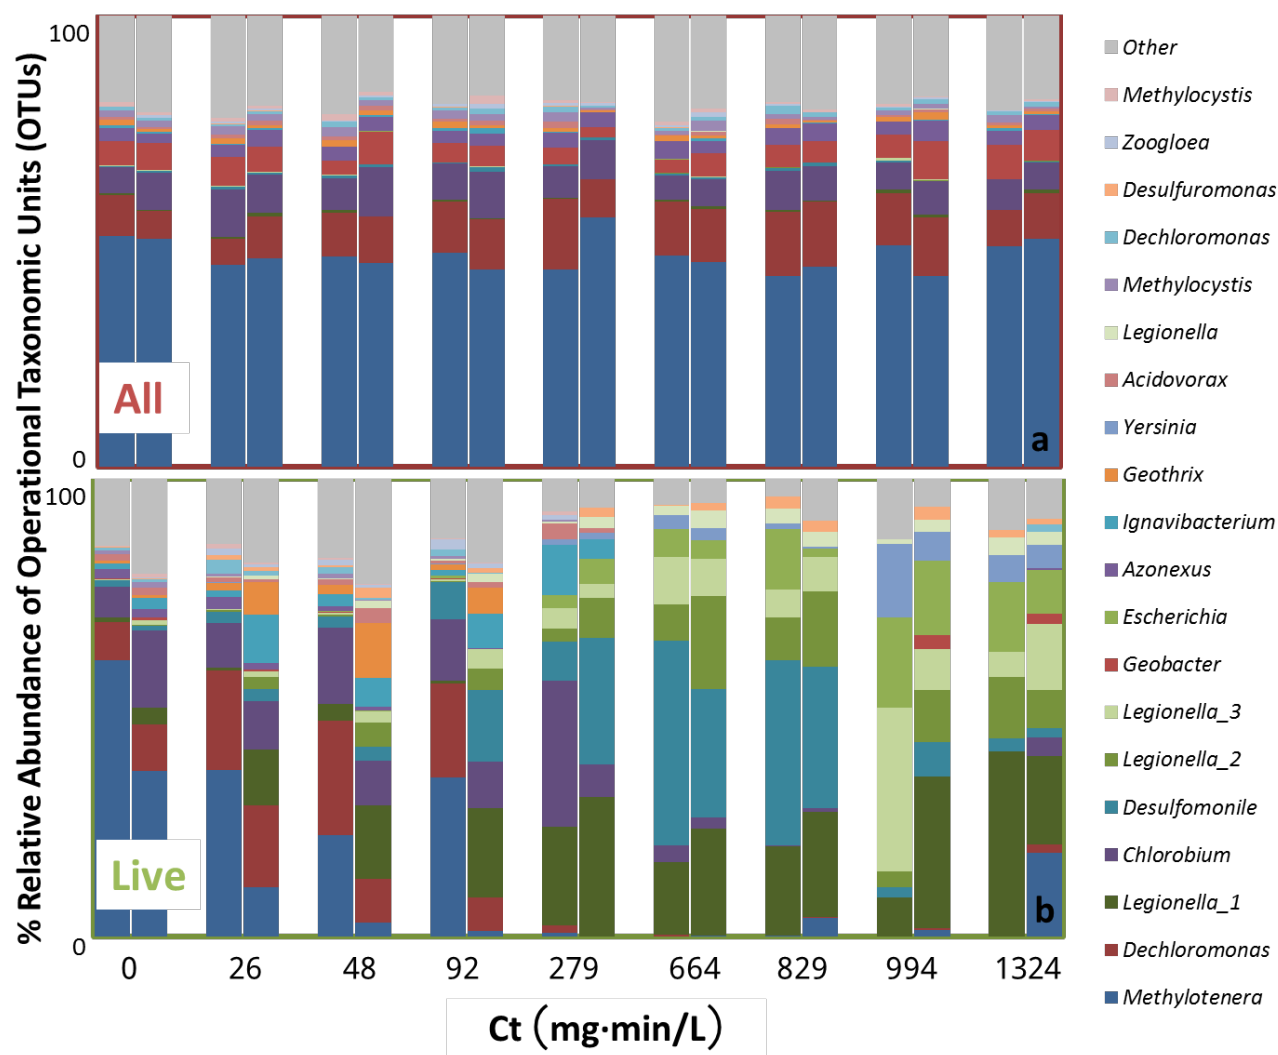

**Figure S4.** Relative abundance of OTUs represented by their taxonomic group for duplicate samples collected from laboratory-scale BAC filter inactivation experiment at different Ct values showing all bacteria (no PMA) (a) and the live fraction (PMA) (b).

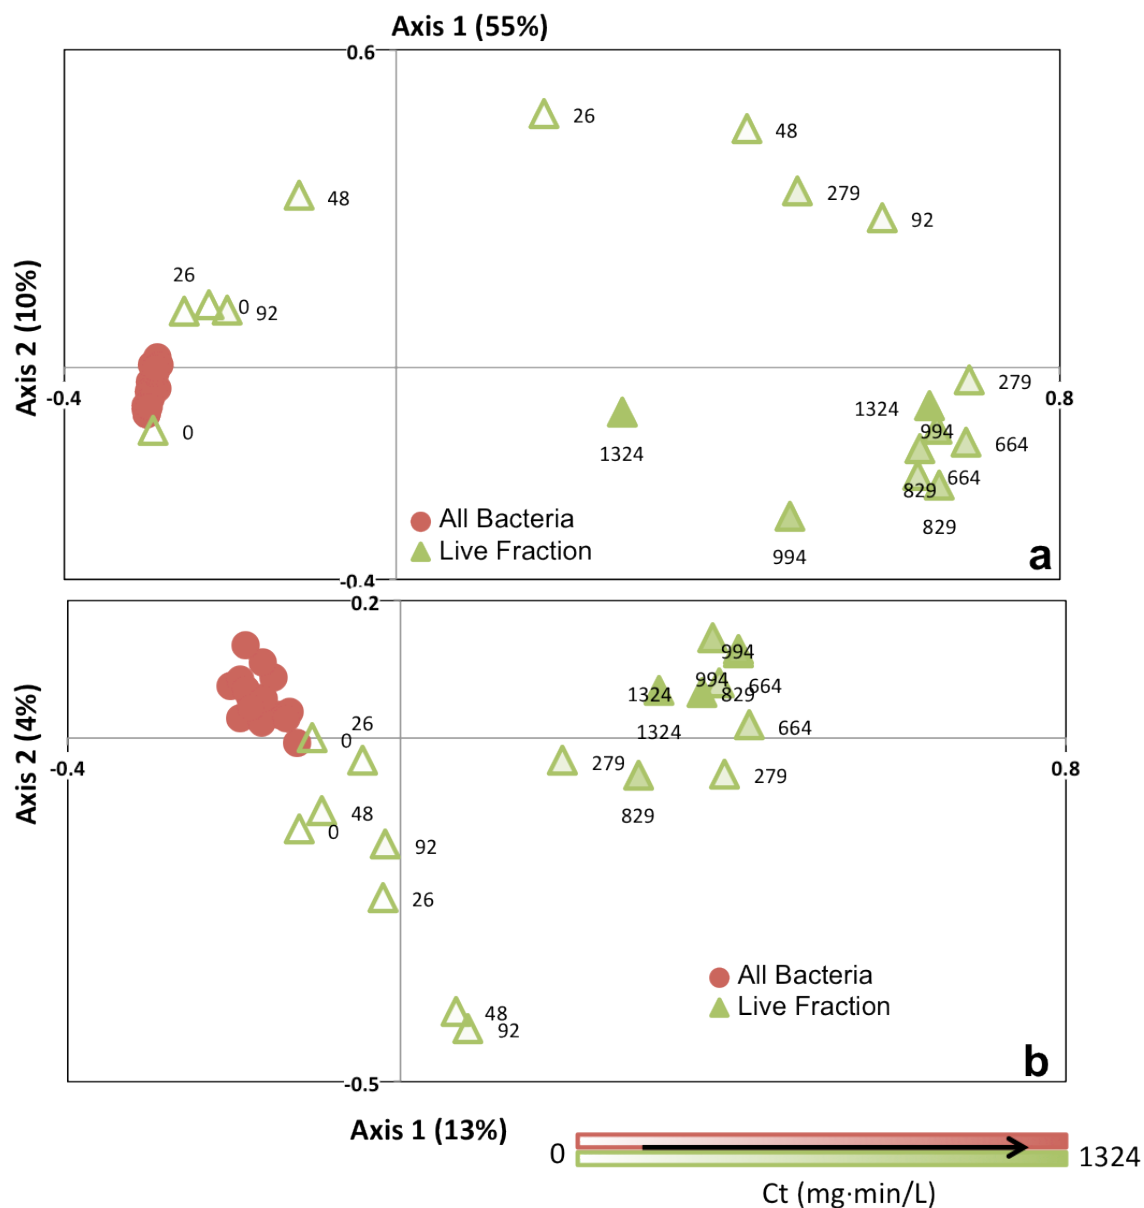

**Figure S5.** Principle coordinate plot showing the community structure ( $\theta_{yc}$ ) (a) and community membership (Jaccard Index) (b) for duplicate samples collected from the laboratory-scale BAC filter inactivation experiment for all bacteria (no PMA) and the live fraction (PMA treated). Numbers represent the Ct values in mg·min/L for the live fraction (PMA treated) samples.



## References

1. Einen, J.; Thorseth, I. H.; Ovreås, L. Enumeration of Archaea and Bacteria in seafloor basalt using real-time quantitative PCR and fluorescence microscopy. *FEMS Microbiology Letters*. **2008**, 282 (2), 182-7.
2. Pinto, A. J.; Raskin, L. PCR biases strongly distort bacterial and archaeal community structure in pyrosequencing. *PLoS One*. **2012**, 7 (8).
